1 **Limited emergence of resistance to Integrase strand transfer inhibitors (INSTIs) in HIV-experienced**  
2 **patients failing dolutegravir-based antiretroviral therapy: Cross-sectional analysis from a**  
3 **Northeast Nigerian cohort**

4

5 Adam Abdullahi<sup>1,2,3§</sup>, Ibrahim Musa Kida<sup>4\*</sup>, Umar Abdullahi Maina<sup>5</sup>, Amina Husaini Ibrahim<sup>6</sup>, James  
6 Mshelia<sup>4</sup>, Haruna Wisso<sup>3</sup>, Abdullahi Adamu<sup>5</sup>, James Ezenwa Onyemata<sup>3</sup>, Haruna Yusuph<sup>4</sup>, Sani H.  
7 Aliyu<sup>7</sup>, Man Charurat<sup>8</sup>, Alash'le Abimiku<sup>3</sup>, Lucie Abeler-Dorner<sup>9</sup>, Christophe Fraser<sup>9</sup>, David Bonsall<sup>9</sup>,  
8 on behalf of the PANGAEA consortium, Steven A. Kemp<sup>1,2\*</sup> and Ravindra K. Gupta<sup>1,2,10\*§\*</sup>

9

10 <sup>1</sup>Cambridge Institute of Therapeutic Immunology & Infectious Disease (CITIID), Cambridge, UK

11 <sup>2</sup>Department of Medicine, University of Cambridge, Cambridge, UK

12 <sup>3</sup>Institute of Human Virology, Abuja, Nigeria

13 <sup>4</sup>Department of Infectious Disease and Clinical Immunology University of Maiduguri, Borno, Nigeria

14 <sup>5</sup>Department of Veterinary Pharmacology and Toxicology, Faculty of Veterinary Medicine, University  
15 of Maiduguri, Borno, Nigeria

16 <sup>6</sup>Oman Medical College, Oman

17 <sup>7</sup>Addenbrooke's Hospital, Cambridge University Hospitals NHS Foundation Trust, Cambridge, UK

18 <sup>8</sup>Institute of Human Virology, University of Maryland School of Medicine, Baltimore, USA

19 <sup>9</sup>Big Data Institute, University of Oxford, UK

20 <sup>10</sup>Africa Health Research Institute, Durban, South Africa

21

22

23

24

25

26

27

28

29 \*Equal senior author contribution

30 §Correspondence:

31 Ravindra K. Gupta

32 [rkg20@cam.ac.uk](mailto:rkg20@cam.ac.uk)

33 or

34 Adam Abdullahi

35 [aa2291@cam.ac.uk](mailto:aa2291@cam.ac.uk)

36 **Abstract**

37 **Background:**

38 Owing to high levels of resistance to previous first-line non-nucleoside reverse transcriptase  
39 inhibitors (NNRTI)-based antiretroviral therapy (ART), consolidated recommendations since 2019,  
40 from the WHO and others, have indicated that dolutegravir (DTG) is the preferred drug of choice for  
41 HIV treatment, globally. There is a paucity of resistance outcome data from non-B HIV subtypes  
42 circulating across West Africa.

43

44 **Aim:**

45 We aimed to characterise the mutational profiles of HIV-positive patients from a small North-East  
46 Nigeria cohort, failing a DTG-based ART regimen.

47

48 **Methods:**

49 Plasma samples were collected and stored from 61 HIV-1 infected participants. Following failure of  
50 DTG-based ART, all samples were sequenced by Illumina whole-genome, ultra-deep sequencing.  
51 Sequencing was successful in (n=33) participants with median age of 40 years and median time on  
52 ART of 9 years. HIV-1 subtyping was performed using SNAPPy. Haplotype reconstruction and  
53 transmission were inferred using standard phylogenetic methods.

54

55 **Result:**

56 Most patients had mutational profiles that were reflective of prior exposure to first- and second-line  
57 ART including exposure to thymidine analogues, efavirenz and nevirapine. One patient had evidence  
58 of major INSTI DRMs (T66A, G118R, E138K and R263K), reducing efficacy of DTG. The participant was  
59 aged 18, infected with a subtype G virus and likely vertically infected.

60

61 **Conclusion:**

62 This study found low level resistance to DTG in the cohort, with one patient having high-level  
63 resistance to DTG and other INSTIs. Critical population level and long-term data on DTG outcomes  
64 are required to guide implementation and policy action across the region.

65

66

67

68

69

70 **Introduction**

71 In the context of rising pre-treatment NNRTI drug resistance<sup>1,2</sup>, the World Health Organisation  
72 (WHO) recommended dolutegravir (DTG) as the preferred antiretroviral therapy (ART) drug of choice  
73 for both newly diagnosed and individuals transitioning from previous regimens<sup>3</sup>. Safety, potency,  
74 tolerability and cost-effective characteristics of dolutegravir (DTG) supported this change<sup>4</sup>  
75 subsequently, countries across sub-Saharan Africa (SSA) have consequently rolled-out dolutegravir  
76 as part of standard treatment. Roll out across the region started in 2019 and is expected to continue,  
77 aided by the availability of a low-cost, generic fixed-dose co-formulation of tenofovir, lamivudine  
78 and dolutegravir (TLD)<sup>5</sup>.

79

80 Dolutegravir-based antiretroviral therapy (ART) have been commercialised and sold in Nigeria since  
81 2019 with the national treatment guideline recommending transitioning to DTG-based ART in both  
82 virally suppressed and unsuppressed patients since 2020<sup>6</sup>. There is no indication of virological or  
83 resistance testing prior to transitioning to DTG-based ART and therefore, majority of patients  
84 transitioned without prior viral load or resistance testing. Data from the ADVANCE and NAMSAL  
85 clinical trials<sup>7,8</sup>, which recruited ART naïve participants exclusively in SSA showed no evidence of  
86 emergence of drug resistance mutations (DRMS) on DTG-based ART. Data from treatment  
87 experienced patients transitioning to TLD is limited although data is starting to emerge.

88

89 Given the high proportion of treatment experienced HIV patients with resistance following failure of  
90 previous first and second-line ART<sup>9</sup>, data on resistance outcome following failure of DTG in non-B  
91 subtypes is highly valuable. Here, we present data on drug resistance using Next-Generation  
92 Sequencing (NGS) in a small Nigerian cohort failing DTG-based ART following roll-out.

93

94 **Methods**

95 **Study population and design**

96 This study was a cross-sectional study performed at the University of Maiduguri Teaching Hospital,  
97 Borno State, Nigeria between January, and June 2021. Study criteria included participants who were  
98 failing a DTG-based ART, ≥18 years of age and attending routine clinic visits. We defined virological  
99 failure as two consecutive HIV-1 RNA > 1000 copies/ml following exposure to a DTG-based ART for ≥  
100 6 months. Patients who met inclusion criteria voluntarily signed informed consent. Available  
101 demographic data including age, gender, ART regimen, duration on ART and current CD4 count were  
102 collected from clinical files and recorded in Microsoft excel.

103

104 **Laboratory methods:**

105 Plasma was separated from whole venous blood in EDTA within 2 hours of collection and stored  
106 immediately at -80°C. Plasma viral load testing and CD4 count were performed at the Defence  
107 Reference Laboratory, Asokoro Abuja using the COBAS AmpliPrep/COBAS TaqMan HIV type 1 (HIV1)  
108 v2.0 test (Roche Diagnostics, Basel, Switzerland). Whole genome sequencing of 61 blood samples  
109 was performed according to the Bonsall et al protocol<sup>10</sup>. Briefly, total RNA was extracted from HIV-  
110 infected plasma samples, washed in ethanol, and eluted using the NUCLISENS easyMAG system  
111 (bioMérieux). Libraries were prepared using the SMARTer Stranded Total RNA-Seq Kits v2 (Clontech,  
112 Takara Bio) according to the manufacturer protocol. Total RNA was denatured, and reverse  
113 transcribed to cDNA and a total of 500ng of pooled libraries were hybridised to custom HIV-specific  
114 biotinylated 120-mer oligonucleotides (xGen Lockdown Probes, Integrated DNA Technologies).  
115 Captured libraries were then PCR amplified to produce a final pool for sequencing with an Illumina  
116 MiSeq (San Diego, CA, USA) to produce up to 300-nucleotide paired-end reads. FastQ files were  
117 trimmed of adapters and mapped iteratively to the best available reference from a curated  
118 alignment of 3000 HIV-1 genomes with SHIVER<sup>11</sup>. Resistance genotyping was performed using an in-  
119 house script that determines the prevalence of DRMS in each sequencing reads and calculates an  
120 overall score (1-4) for each ART, according to the Stanford HIV drug resistance algorithm (v9.1).

121

122 **Bioinformatics analysis:**

123 Haplotypes were reconstructed using ClaqueSNV v2.0.3<sup>12</sup>. Phylogenies were inferred with IQTREE2  
124 v2.2.2<sup>13</sup> using a GTR+F+I+R4 model with 1000 rapid bootstraps. Inference of transmission was made  
125 Phyloscanner v1.8.1<sup>14</sup> using overlapping windows of 150 bp across the whole genome. Phylogenies  
126 were rooted on a HIV-1 subtype G consensus sequence downloaded from the Los Alamos National  
127 HIV Database. HIV-1 subtyping was performed using SNAPPY v1.0. Prediction of co-receptor usage  
128 was made using TROPHIX (prediction of HIV-1 tropism). Available at: [http://sourceforge.net/  
129 projects/trophix/](http://sourceforge.net/projects/trophix/)).

130

131 **Statistical analyses:**

132 The characteristics of the study population were summarized as either categorical or continuous  
133 variables and reported as either proportions or medians with interquartile ranges (IQRs),  
134 respectively. Analyses were performed with STATA v17 (StataCorp, College Station, TX).

135

136

137

138 **Ethics:**

139 The study was approved by the University of Maiduguri Teaching Hospital Ethics Committee  
140 (UMTH/REC/21/714). All participants provided written informed consent.

141

142 **Results**

143 61 had samples available for resistance testing. Following sequencing and quality control, 33  
144 samples (61.7%) were of sufficient quality (i.e., fully in-tact *pol* gene and depth of  $\geq 500x$ ) to  
145 determine DRMS and minority variants (Median viral load in these samples was  $4.1 \log_{10}$  copies/ml  
146 (range 3.0-5.2). Using a minimum threshold of 20%, NRTI, NNRTI, PI and INSTI DRMS occurred in 17  
147 (50%), 24 (70.6%), 4 (11.8%) and 1 (2.9%) of samples respectively (Figure 1a). Dual-class resistance  
148 occurred in 17 (50%) patients and tri-class mutations occurred in 5 (14.7%) patients. Consistent with  
149 likely long-term exposure to lamivudine, the most prevalent NRTI mutation DRMS was M184V. The  
150 most prevalent NNRTI DRMS was K103N, reflecting previous exposure to nevirapine and efavirenz.  
151 Mutational profiles were similar across 2, 10 and 20% interpretative thresholds (Figure 1b).

152

153 One patient of interest was found to have high-level resistance to NRTIs, NNRTIs and INSTIs,  
154 including almost complete resistance to the novel long-acting injectable, cabotegravir. Mutations  
155 included inE138K, inG118R, inT66A, inR263K, rtH221Y, rtV108I, rtK103N, rtM184V, rtM41L, rtA98G  
156 and rtT215Y, all at frequencies of  $>40\%$ , with a mean read depth of 770x. This patient was  
157 established on DTG for a median of 1.2 years and on ART for a median of 12 years. Clinical data on  
158 other clinical data including nadir CD4 counts were unavailable. Using the SNAPPy HIV-1 subtyping  
159 tool, almost 40% of viruses were assigned to Subtype G, and 15% were G\_A1 subtypes. The  
160 remaining viruses were recombinants (Table 1).

161

162 To identify within-host diversity and potential transmission of DRMs between patients, we  
163 reconstructed viral haplotypes (Figure 2) for each patient. These were homogeneous and the same  
164 resistance mutations were identified on all reconstructed haplotypes for each patient. Following  
165 this, we investigated whether there was evidence of direct transmission between any patients in this  
166 cohort (Supplementary Figure 1). However, no significant transmission pairs were identified,  
167 indicating that there were several intermediaries between patients which have not yet been  
168 sampled. Of note, two patients' virus was predicted to use the CXCR-4 co-receptor.

169

170

171

172 **Discussion**

173 After rollout of previous first-line NNRTI based ART, DRMS were previously observed within first year  
174 of failure in around 15 and 35% of patients with resistance emerging against both lamivudine,  
175 tenofovir and NNRTIs<sup>16,17</sup>. Drug resistance has been associated with mortality in hospitalised  
176 individuals in LMIC settings<sup>18</sup>. The second generation INSTI DTG has been systematically adopted  
177 and rolled out across the SSA region since 2019, with concerns of the emergence of resistance  
178 associated mutations following failure under a limited monitoring infrastructure. In a recent analysis  
179 of pooled evidence on virological and resistance outcomes following DTG failure in SSA region, there  
180 was an overall high rate of virological response to DTG; 88.5% (95% CI: 73.8-97.8) with the overall  
181 proportion of patients failing showing limited evidence of DRMS<sup>19</sup> over short periods of time. It is  
182 likely that prolonged virologic failure will select for DRM to components of ART regimens within the  
183 viral quasispecies as a result of intrahost evolution<sup>20,21</sup>.

184

185 It is important to note that pre-existing DRMS prior to switch to DTG may be critical to both  
186 virological and resistance outcomes with study evidence suggesting pre-existing NNRTI mutations  
187 reducing the short term efficacy of DTG<sup>22</sup>, although other studies across the region have shown  
188 similar rates of both virological and resistance outcomes in ART naïve<sup>23,24</sup> and experienced  
189 patients<sup>25,26</sup> (with no evidence of DRMs) and ART experienced patients with historical evidence of  
190 NRTI mutation (especially M184V/I)<sup>27-29</sup>.

191

192 Here, in this cross-sectional analysis, we assessed drug resistance using next-generation sequencing  
193 in a small cohort of HIV-1 infected subjects failing DTG-based ART using a failure threshold of 1000  
194 copies/ml. Most patients were treatment experienced and amongst 33 participants with sequence  
195 data, mutational patterns observed were reflective of exposure to previous first-line NNRTI with only  
196 1/34 (3%) showing evidence of DRMS against DTG or protease inhibitors. The individual with DTG  
197 resistance was vertically infected with evidence of selection of mutations conferring high level  
198 resistance to dolutegravir and other INSTIs i.e T66A, G118R, E138K (accessory) and R263K. The T66A  
199 mutation is non-polymorphic and primarily selected by elvitegravir (EVG) and raltegravir (RAL) with  
200 ~9-fold reduction in susceptibility to EVG but minimal impact on other INSTIs whilst the E138K  
201 mutation has negligible effect on susceptibility to INSTIs although a combination of E138K and other  
202 DRMs may lead to further decreased susceptibility to DTG<sup>30</sup>. Further, the G118R and R263K  
203 mutations observed in this patient, which causes between 2 to 15 fold reduction to DTG  
204 susceptibility<sup>31,32</sup> have also been observed in patients experiencing virological failure to INSTI drug  
205 agents in non-B HIV subtypes<sup>33-36</sup>. It is likely that the G118R mutation emerged first and led to the

206 accumulation of other mutations including the E138K compensatory mutation as the G118R  
207 mutation has been described as the DTG-resistance pathway in non-B subtype<sup>31,37</sup>.

208

209 In context of the continuously expanding use of DTG, the most convenient approach to managing  
210 patients on DTG with persistent viraemia remains uncertain especially in resource limited setting  
211 such as this, where drug resistance testing capacity remains limited<sup>38</sup>. Several factors may increase  
212 the likelihood of the emergence of DTG resistance across the region including prolonged virological  
213 failure due to lack of routine virological monitoring<sup>39,40</sup> and poor treatment adherence which is an  
214 independent determinant of virological outcome<sup>41</sup> in these settings. Further analyses of resistance  
215 across SSA are warranted over extended periods, as well as surveillance for INSTI resistance in newly  
216 diagnosed individuals. This is even more critical given INSTI based long acting injectables are being  
217 considered as PreP<sup>42</sup>.

218

#### 219 **Acknowledgements:**

220

221 We are thankful to the volunteers who participated in the study. A.A. is supported by Africa  
222 Research Excellence Fund Research Development Fellowship (AREF-318-ABDUL-F-C0882) and  
223 Cambridge-Africa award. A.A. and S.A.K. are supported by Bill and Melinda Gates Foundation via the  
224 Phylogenetics and Networks for Generalised Epidemics in Africa (PANGEA) (grant number  
225 OPP1175094). R.K.G. is supported by a Wellcome Trust Senior Fellowship in Clinical Science  
226 (WT108082AIA).

227

#### 228 **Author contributions**

229 Study conception, design and administration: A.A, R.K.G and I.M.K; data collection: A.A, I.M.K, A.H.I,  
230 J.M, A.Ad, J.E.O, H.Y, S.H.A, A.Ab, S.K and R.K.G; data analysis: A.A., I.M.K, S.K, A.Ab and R.K.G; data  
231 interpretation: A.A, S.K, A.Ab and R.K.G; manuscript preparation; A.A wrote the first draft of the  
232 manuscript with the critical input of all co-authors. All authors reviewed the results and approved  
233 the final version of the manuscript.

234

235

236

237

238

239

240

241

242

243 **Table 1:** Characteristics of study participants with successful genotyping

|                                               |                  |              |
|-----------------------------------------------|------------------|--------------|
| Characteristic                                |                  | 244          |
| Total number (%)                              | 33 (100)         | 245          |
| Female, n (%)                                 | 20 (61)          | 246          |
| Age, median years (IQR)                       | 40 (35, 48)      | 247          |
| CD4 count, median cells/mm <sup>3</sup> (IQR) | 200 (300, 462)   | 248          |
| ART regimen, (%)                              |                  | 249          |
|                                               | TDF+3TC+DTG      | 33 (100) 250 |
| ART regimen prior to DTG                      |                  | 251          |
|                                               | TDF+3TC+LPV/r    | 17 (52) 252  |
|                                               | TDF+3TC+ATV/r    | 4 (12) 253   |
|                                               | AZT+3TC+EFV      | 8 (24) 254   |
|                                               | ABC+3TC+EFV      | 2 (6) 255    |
|                                               | No prior ART     | 2 (6) 256    |
| Time on DTG, median years (IQR)               | 1.8 (1.4, 1.9)   | 257          |
| Time on ART, median years (IQR)               | 9.3 (5.8, 15.0)  | 258          |
| ART status                                    |                  | 259          |
|                                               | Switching to DTG | 31 (94) 260  |
|                                               | Starting DTG     | 2 (6) 261    |
| HIV-1 subtype, n (%) <sup>b</sup>             |                  | 262          |
|                                               | G                | 2 (6) 263    |
|                                               | G/A1             | 13 (39) 264  |
|                                               | CRF02_AG         | 5 (15) 265   |
|                                               | A (A1)           | 3 (9) 266    |
|                                               | CRF02_AG/G       | 2 (6) 267    |
|                                               | O2AG/A1          | 2 (6) 268    |
|                                               | Others           | 2 (6) 269    |
|                                               |                  | 6 (18) 270   |
|                                               |                  | 271          |
|                                               |                  | 272          |
|                                               |                  | 273          |
|                                               |                  | 274          |
|                                               |                  | 275          |
|                                               |                  | 276          |

277 <sup>a</sup>Data available from 25 participants; <sup>b</sup>Other subtypes comprising CRF06\_CPX (n=1); CRF13\_CPX-like (n=1);  
 278 CRF13\_CPX/G (n=1); CRF 11\_CPX (n=1); G/C (n=1); G/J/A (n=1).  
 279



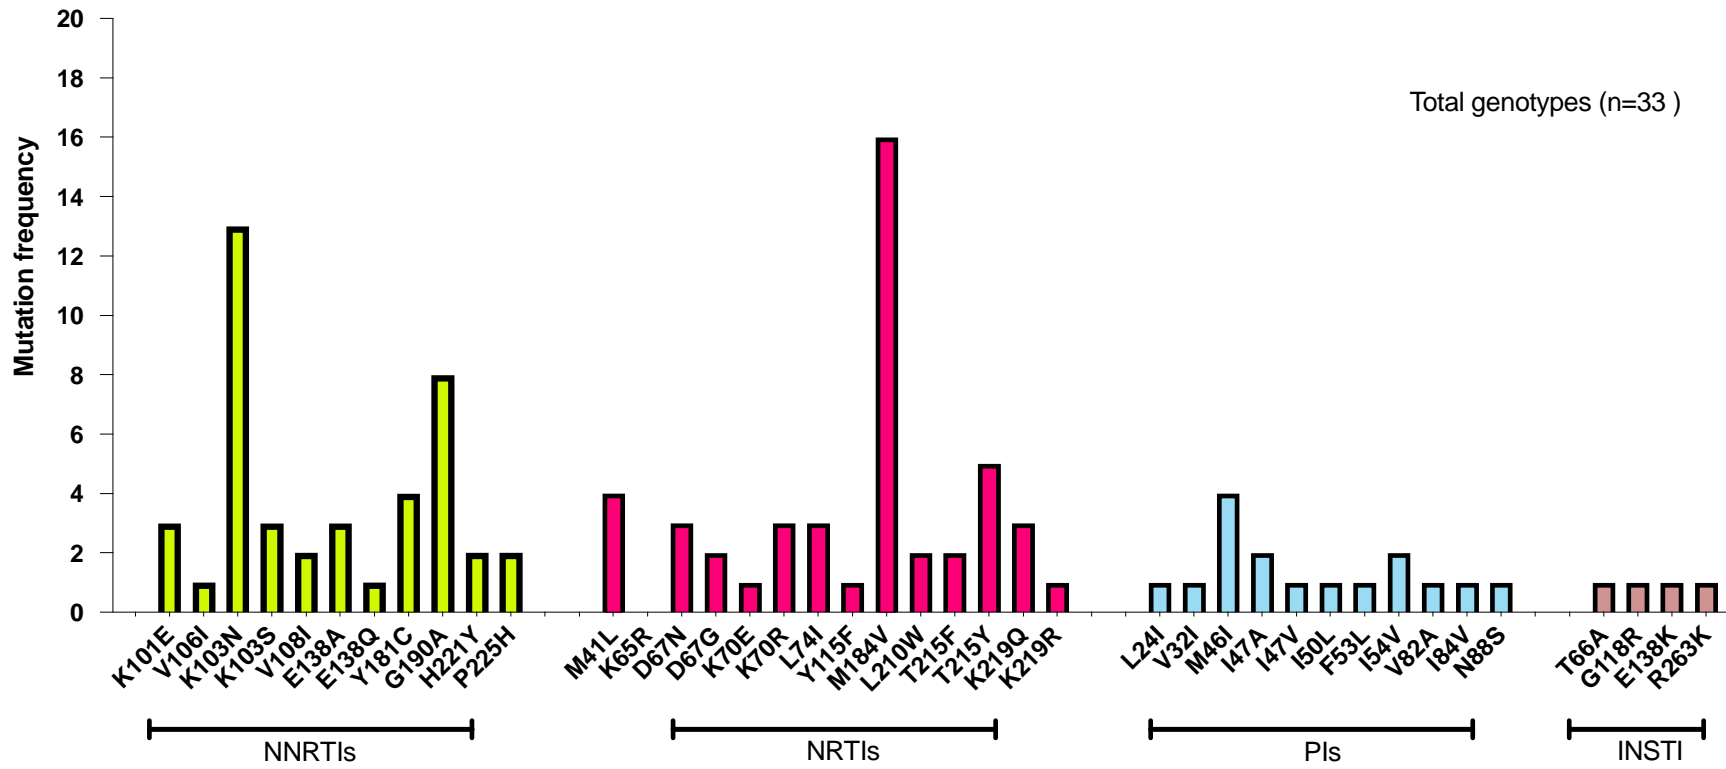

280

281

**Figure 1a:** Proportion of patients with resistance associated mutations using the Stanford algorithm.

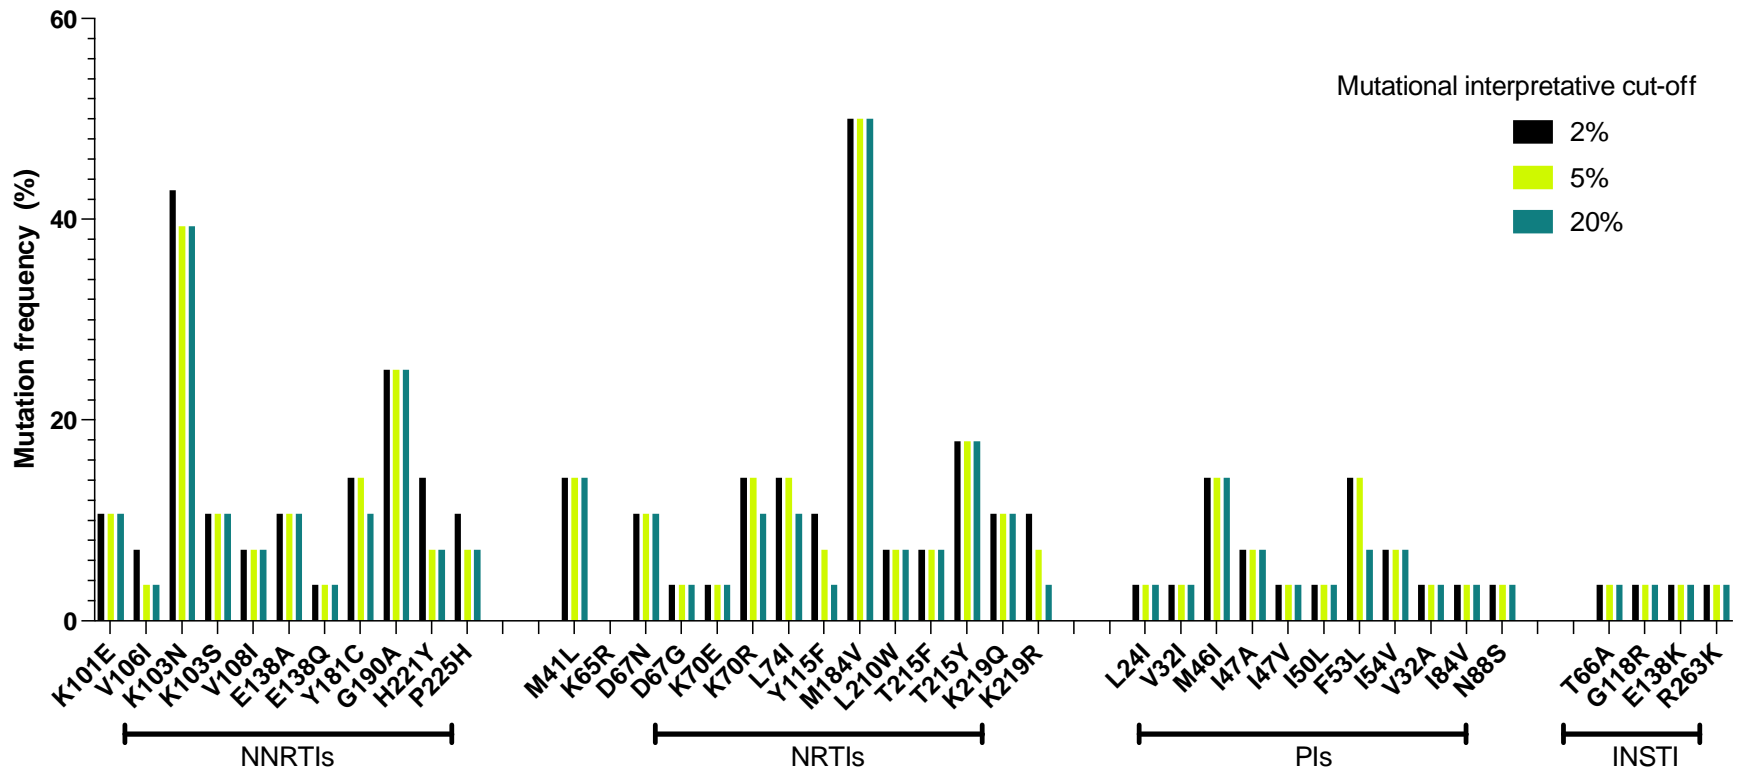

282

283

284

285

286

287

288

**Figure 1b:** Proportion of patients with resistance associated mutations using the Stanford algorithm, sub-divided into interpretational cut-offs of 2, 5 and 20%. Evidence suggest that minority variants may play a role in drug resistance (<https://doi.org/10.1128/mbio.00269-22>).

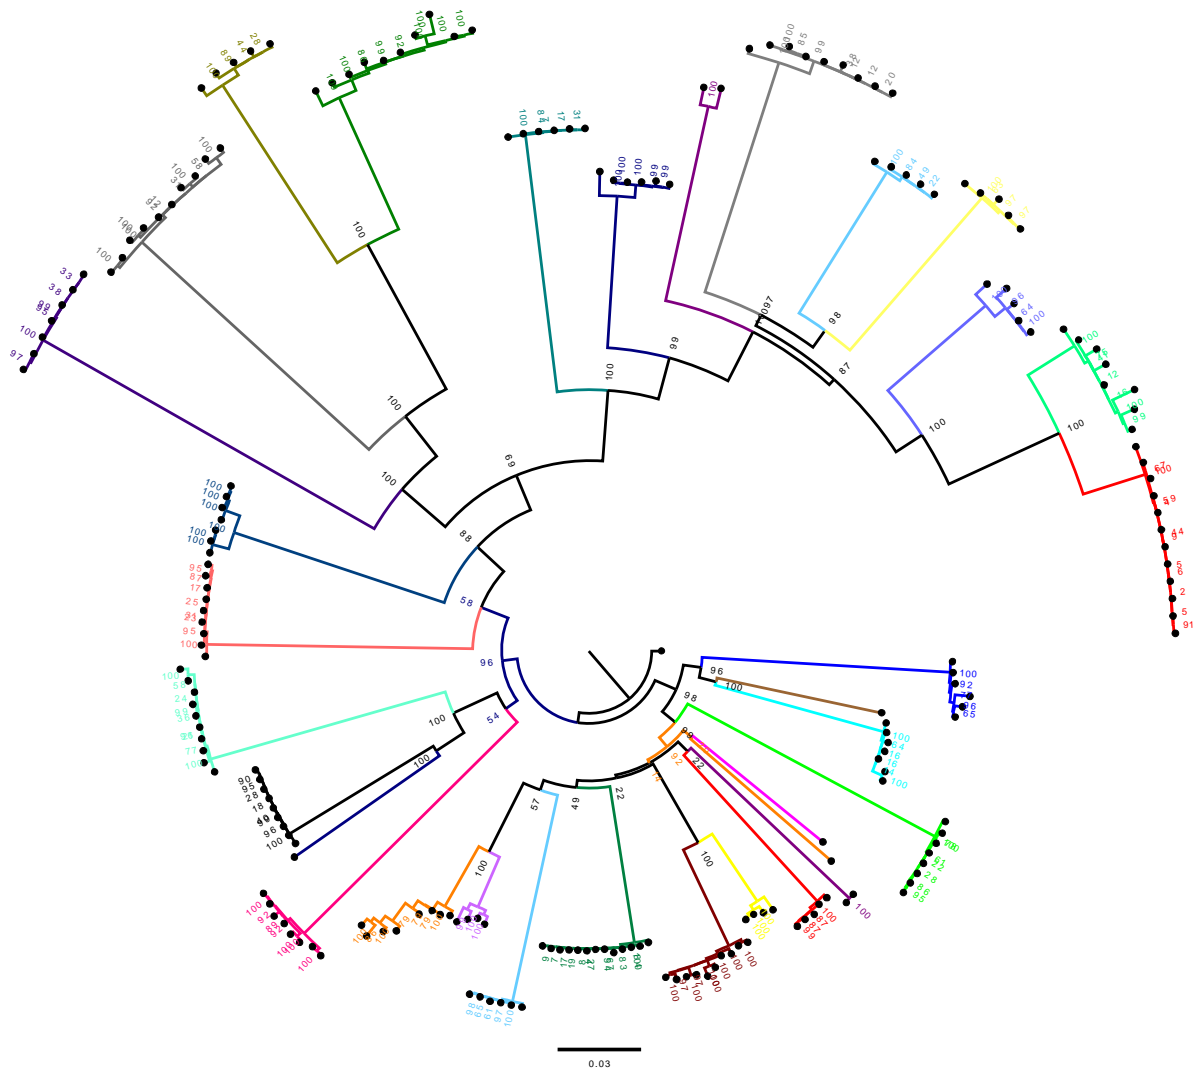

289

290 **Figure 2.** Maximum-likelihood phylogeny of reconstructed haplotypes from each patient. Haplotypes  
291 were homogeneous and had the majority of the same mutations on each haplotype. Bootstraps are  
292 indicated at each node.

293

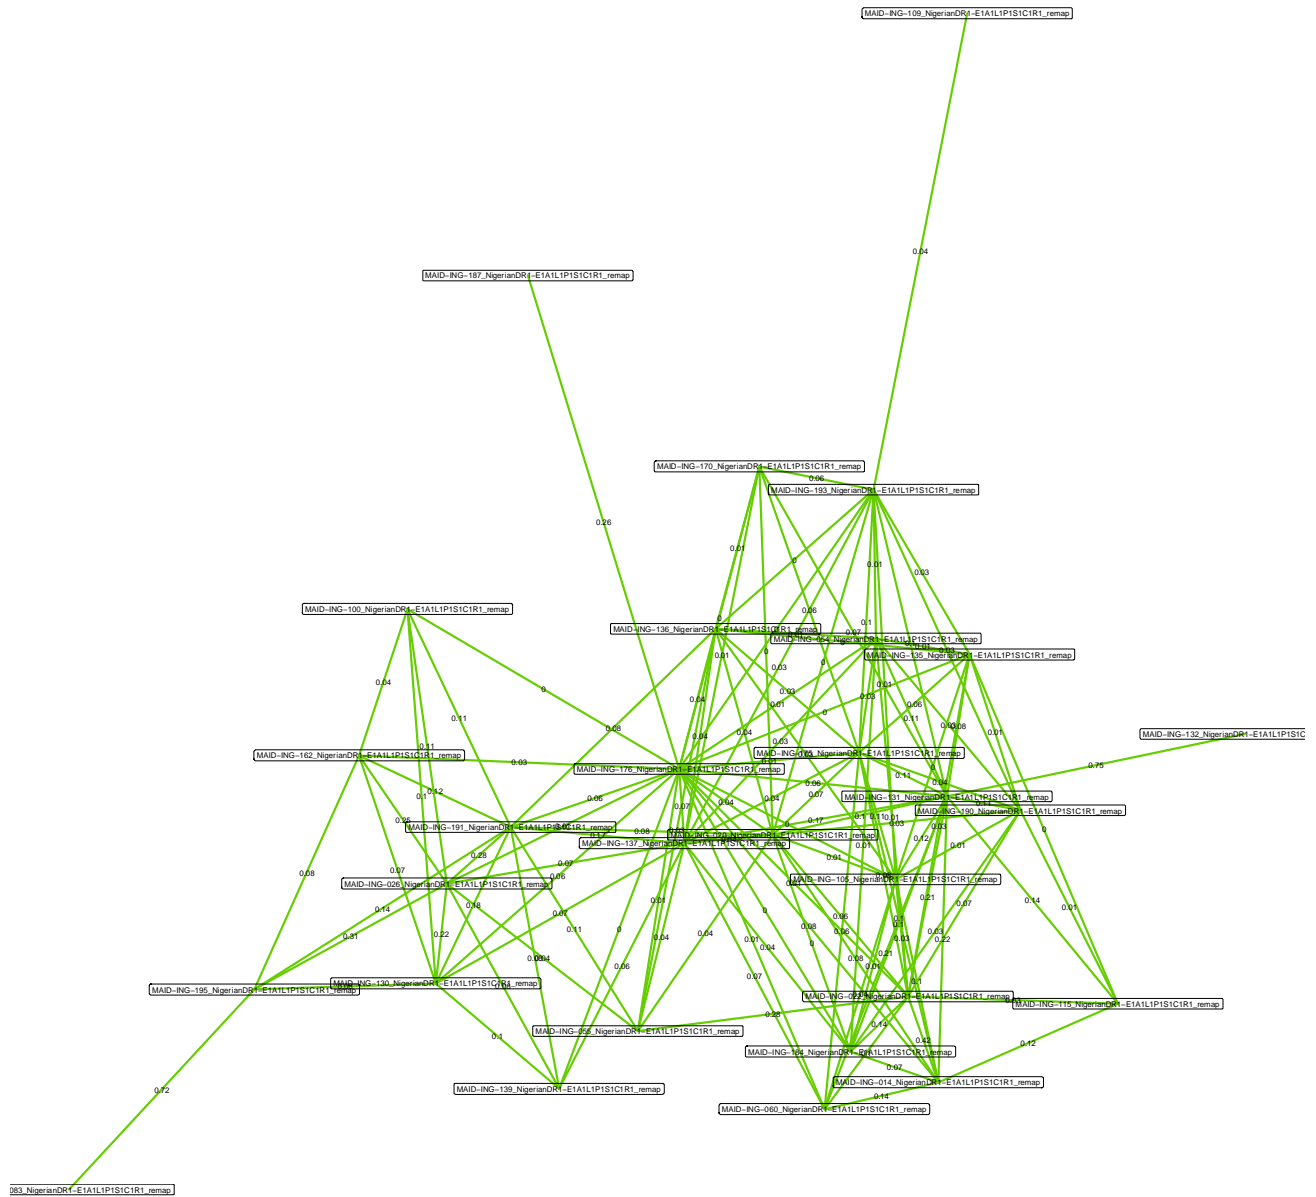

294 **Supplementary Figure 1:** Inferred transmission network of all patients in the cohort. Green lines  
295 indicate a degree of linkage between two sequences, but without sufficient statistical support to  
296 indicate a direct transmission event has occurred.  
297

298

299

300 **References:**

- 301 1. Gupta RK, Jordan MR, Sultan BJ, *et al.* Global trends in antiretroviral resistance in treatment-naive  
302 individuals with HIV after rollout of antiretroviral treatment in resource-limited settings: a global  
303 collaborative study and meta-regression analysis. *Lancet (London, England)* 2012; **380**: 1250–8.
- 304 2. Gupta RK, Gregson J, Parkin N, *et al.* HIV-1 drug resistance before initiation or re-initiation of first-  
305 line antiretroviral therapy in low-income and middle-income countries: a systematic review and  
306 meta-regression analysis. *Lancet Infect Dis* 2018; **18**: 346–55.
- 307 3. World Health Organization. *Update of recommendations on first- and second-line antiretroviral*  
308 *regimens*. 2019. Available at: [https://apps.who.int/iris/bitstream/handle/10665/325892/WHO-CDS-](https://apps.who.int/iris/bitstream/handle/10665/325892/WHO-CDS-HIV-19.15-eng.pdf?ua=1)  
309 [HIV-19.15-eng.pdf?ua=1](https://apps.who.int/iris/bitstream/handle/10665/325892/WHO-CDS-HIV-19.15-eng.pdf?ua=1).
- 310 4. Jamieson L, Serenata C, Makhubele L, *et al.* Cost and cost-effectiveness of dolutegravir-based  
311 antiretroviral regimens: an economic evaluation of a clinical trial. *AIDS* 2021; **35**. Available at:  
312 [https://journals.lww.com/aidsonline/Fulltext/2021/12152/Cost\\_and\\_cost\\_effectiveness\\_of\\_doluteg](https://journals.lww.com/aidsonline/Fulltext/2021/12152/Cost_and_cost_effectiveness_of_doluteg_ravir_based.9.aspx)  
313 [ravir\\_based.9.aspx](https://journals.lww.com/aidsonline/Fulltext/2021/12152/Cost_and_cost_effectiveness_of_doluteg_ravir_based.9.aspx).
- 314 5. Dorward J, Hamers RL. Dolutegravir in sub-Saharan Africa: context is crucial. *Lancet HIV* 2019; **6**:  
315 e72–3. Available at: [https://doi.org/10.1016/S2352-3018\(18\)30331-X](https://doi.org/10.1016/S2352-3018(18)30331-X).
- 316 6. Federal Ministry of Health Abuja Nigeria. *National guideline for HIV prevention, treatment and*  
317 *care*. 2020.
- 318 7. Calmy A, Tovar Sanchez T, Kouanfack C, *et al.* Dolutegravir-based and low-dose efavirenz-based  
319 regimen for the initial treatment of HIV-1 infection (NAMSAL): week 96 results from a two-group,  
320 multicentre, randomised, open label, phase 3 non-inferiority trial in Cameroon. *lancet HIV* 2020; **7**:  
321 e677–87.
- 322 8. Venter WDF, Sokhela S, Simmons B, *et al.* Dolutegravir with emtricitabine and tenofovir  
323 alafenamide or tenofovir disoproxil fumarate versus efavirenz, emtricitabine, and tenofovir  
324 disoproxil fumarate for initial treatment of HIV-1 infection (ADVANCE): week 96 results from a  
325 randomised, phase 3, . *lancet HIV* 2020; **7**: e666–76.
- 326 9. Stockdale AJ, Saunders MJ, Boyd MA, *et al.* Effectiveness of Protease Inhibitor/Nucleos(t)ide  
327 Reverse Transcriptase Inhibitor–Based Second-line Antiretroviral Therapy for the Treatment of  
328 Human Immunodeficiency Virus Type 1 Infection in Sub-Saharan Africa: A Systematic Review and  
329 Meta-analysis. *Clin Infect Dis* 2017; **66**. Available at: [https://academic.oup.com/cid/advance-](https://academic.oup.com/cid/advance-article/doi/10.1093/cid/cix1108/4767830)  
330 [article/doi/10.1093/cid/cix1108/4767830](https://academic.oup.com/cid/advance-article/doi/10.1093/cid/cix1108/4767830).
- 331 10. Bonsall D, Golubchik T, de Cesare M, *et al.* A Comprehensive Genomics Solution for HIV  
332 Surveillance and Clinical Monitoring in Low-Income Settings. *J Clin Microbiol* 2020; **58**.
- 333 11. Wymant C, Blanquart F, Golubchik T, *et al.* Easy and accurate reconstruction of whole HIV

- 334 genomes from short-read sequence data with shiver. *Virus Evol* 2018; **4**: vey007.
- 335 12. Knyazev S, Tsyvina V, Shankar A, *et al.* Accurate assembly of minority viral haplotypes from next-  
336 generation sequencing through efficient noise reduction. *Nucleic Acids Res* 2021; **49**: e102–e102.  
337 Available at: <https://doi.org/10.1093/nar/gkab576>.
- 338 13. Minh BQ, Schmidt HA, Chernomor O, *et al.* IQ-TREE 2: New Models and Efficient Methods for  
339 Phylogenetic Inference in the Genomic Era. *Mol Biol Evol* 2020; **37**: 1530–4. Available at:  
340 <https://doi.org/10.1093/molbev/msaa015>.
- 341 14. Wymant C, Hall M, Ratmann O, *et al.* PHYLOSCANNER: Inferring Transmission from Within- and  
342 Between-Host Pathogen Genetic Diversity. *Mol Biol Evol* 2018; **35**: 719–33. Available at:  
343 <https://doi.org/10.1093/molbev/msx304>.
- 344 15. Araújo PMM, Martins JS, Osório NS. SNAPPY: A snakemake pipeline for scalable HIV-1 subtyping  
345 by phylogenetic pairing. *Virus Evol* 2019; **5**: vez050. Available at: <https://doi.org/10.1093/ve/vez050>.
- 346 16. Gregson J, Kaleebu P, Marconi VC, *et al.* Occult HIV-1 drug resistance to thymidine analogues  
347 following failure of first-line tenofovir combined with a cytosine analogue and nevirapine or  
348 efavirenz in sub Saharan Africa: a retrospective multi-centre cohort study. *Lancet Infect Dis* 2017; **17**:  
349 296–304.
- 350 17. Tenores Study Group. Global epidemiology of drug resistance after failure of WHO  
351 recommended first-line regimens for adult HIV-1 infection: a multicentre retrospective cohort study.  
352 *Lancet Infect Dis* 2016; **16**: 565–75.
- 353 18. Gupta-Wright A, Fielding K, van Oosterhout JJ, *et al.* Virological failure, HIV-1 drug resistance, and  
354 early mortality in adults admitted to hospital in Malawi: an observational cohort study. *lancet HIV*  
355 2020; **7**: e620–8.
- 356 19. Ngoufack Jagni Semengue E, Santoro MM, Ndze VN, *et al.* HIV-1 integrase resistance associated  
357 mutations and the use of dolutegravir in Sub-Saharan Africa: A systematic review and meta-analysis.  
358 *PLOS Glob Public Heal* 2022; **2**: e0000826. Available at:  
359 <https://doi.org/10.1371/journal.pgph.0000826>.
- 360 20. Datir R, Kemp S, El Bouzidi K, *et al.* In Vivo Emergence of a Novel Protease Inhibitor Resistance  
361 Signature in HIV-1 Matrix. *MBio* 2020; **11**.
- 362 21. A. KS, J. CO, Anne D, *et al.* HIV-1 Evolutionary Dynamics under Nonsuppressive Antiretroviral  
363 Therapy. *MBio* 2022; **13**: e00269-22. Available at: <https://doi.org/10.1128/mbio.00269-22>.
- 364 22. Siedner MJ, Moorhouse MA, Simmons B, *et al.* Reduced efficacy of HIV-1 integrase inhibitors in  
365 patients with drug resistance mutations in reverse transcriptase. *Nat Commun* 2020; **11**: 5922.
- 366 23. Maggiolo F, Gulminetti R, Pagnucco L, *et al.* Lamivudine/dolutegravir dual therapy in HIV-  
367 infected, virologically suppressed patients. *BMC Infect Dis* 2017; **17**: 215.

- 368 24. Joly V, Burdet C, Landman R, *et al.* Dolutegravir and lamivudine maintenance therapy in HIV-1  
369 virologically suppressed patients: results of the ANRS 167 trial (LAMIDOL). *J Antimicrob Chemother*  
370 2019; **74**: 739–45.
- 371 25. Taiwo BO, Marconi VC, Berzins B, *et al.* Dolutegravir Plus Lamivudine Maintains Human  
372 Immunodeficiency Virus-1 Suppression Through Week 48 in a Pilot Randomized Trial. *Clin Infect Dis*  
373 *an Off Publ Infect Dis Soc Am* 2018; **66**: 1794–7.
- 374 26. Cahn P, Madero JS, Arribas JR, *et al.* Dolutegravir plus lamivudine versus dolutegravir plus  
375 tenofovir disoproxil fumarate and emtricitabine in antiretroviral-naïve adults with HIV-1 infection  
376 (GEMINI-1 and GEMINI-2): week 48 results from two multicentre, double-blind, randomised, non-  
377 inferior. *Lancet (London, England)* 2019; **393**: 143–55.
- 378 27. Hidalgo-Tenorio C, Cortés LL, Gutiérrez A, *et al.* DOLAMA study: Effectiveness, safety and  
379 pharmacoeconomic analysis of dual therapy with dolutegravir and lamivudine in virologically  
380 suppressed HIV-1 patients. *Medicine (Baltimore)* 2019; **98**: e16813.
- 381 28. Jary A, Marcelin A-G, Charpentier C, *et al.* M184V/I does not impact the efficacy of  
382 abacavir/lamivudine/dolutegravir use as switch therapy in virologically suppressed patients. *J*  
383 *Antimicrob Chemother* 2020; **75**: 1290–3. Available at: <https://doi.org/10.1093/jac/dkaa019>.
- 384 29. De Miguel R, Rial-Crestelo D, Dominguez-Dominguez L, *et al.* Dolutegravir plus lamivudine for  
385 maintenance of HIV viral suppression in adults with and without historical resistance to lamivudine:  
386 48-week results of a non-randomized, pilot clinical trial (ART-PRO). *eBioMedicine* 2020; **55**. Available  
387 at: <https://doi.org/10.1016/j.ebiom.2020.102779>.
- 388 30. Mesplède T, Osman N, Wares M, *et al.* Addition of E138K to R263K in HIV integrase increases  
389 resistance to dolutegravir, but fails to restore activity of the HIV integrase enzyme and viral  
390 replication capacity. *J Antimicrob Chemother* 2014; **69**: 2733–40.
- 391 31. Rhee S-Y, Grant PM, Tzou PL, *et al.* A systematic review of the genetic mechanisms of  
392 dolutegravir resistance. *J Antimicrob Chemother* 2019; **74**: 3135–49.
- 393 32. Brenner BG, Thomas R, Blanco JL, *et al.* Development of a G118R mutation in HIV-1 integrase  
394 following a switch to dolutegravir monotherapy leading to cross-resistance to integrase inhibitors. *J*  
395 *Antimicrob Chemother* 2016; **71**: 1948–53.
- 396 33. Ahmed N, Flavell S, Ferns B, *et al.* Development of the R263K Mutation to Dolutegravir in an HIV-  
397 1 Subtype D Virus Harboring 3 Class-Drug Resistance. *Open forum Infect Dis* 2019; **6**: ofy329.
- 398 34. Chimbetete C, Chirimuta L, Pascoe M, Keiser O. A case report of untreatable HIV infection in  
399 Harare, Zimbabwe. *South Afr J HIV Med* 2019; **20**: 885.
- 400 35. Ndashimye E, Avino M, Kyeyune F, *et al.* Absence of HIV-1 Drug Resistance Mutations Supports  
401 the Use of Dolutegravir in Uganda. *AIDS Res Hum Retroviruses* 2018; **34**: 404–14.

- 402 36. Mahomed K, Wallis CL, Dunn L, Maharaj S, Maartens G, Meintjes G. Case report: Emergence of  
403 dolutegravir resistance in a patient on second-line antiretroviral therapy. *South African J HIV Med*  
404 *Vol 21, No 1 (2020)DO - 104102/sajhivmed.v21i11062* 2020. Available at:  
405 <https://sajhivmed.org.za/index.php/hivmed/article/view/1062>.
- 406 37. Semengue ENJ, Armenia D, Inzaule S, *et al*. Baseline integrase drug resistance mutations and  
407 conserved regions across HIV-1 clades in Cameroon: implications for transition to dolutegravir in  
408 resource-limited settings. *J Antimicrob Chemother* 2021.
- 409 38. da Silva J, Pals S, Chang J, Hackett S, Godfrey C, Raizes E. Monitoring Emerging Human  
410 Immunodeficiency Virus Drug Resistance in Sub-Saharan Africa in the Era of Dolutegravir. *J Infect Dis*  
411 2022; **225**: 364–6. Available at: <https://doi.org/10.1093/infdis/jiab382>.
- 412 39. Villa G, Abdullahi A, Owusu D, *et al*. Determining virological suppression and resuppression by  
413 point-of-care viral load testing in a HIV care setting in sub-Saharan Africa. *EClinicalMedicine* 2020;  
414 **18**. Available at: <https://doi.org/10.1016/j.eclinm.2019.12.001>.
- 415 40. Gupta RK, Hill A, Sawyer AW, *et al*. Virological monitoring and resistance to first-line highly active  
416 antiretroviral therapy in adults infected with HIV-1 treated under WHO guidelines: a systematic  
417 review and meta-analysis. *Lancet Infect Dis* 2009; **9**: 409–17.
- 418 41. Geretti AM, Abdullahi A, Mafotsing Fopoussi O, *et al*. An apparent paradox: resistance mutations  
419 in HIV-1 DNA predict improved virological responses to antiretroviral therapy. *J Antimicrob*  
420 *Chemother* 2019; **74**: 3011–5.
- 421 42. World Health Organization. *Guidelines on long-acting injectable cabotegravir for HIV prevention*.  
422 2022. Available at: <https://www.who.int/publications/i/item/9789240054097>.
- 423
